# Supplementary material for: Nutritional supplementation during pulmonary rehabilitation in COPD: A systematic review
Source: PubMed Central journal article supplement — Chron Respir Dis. 2020 Feb 13;17:1479973120904953. doi: 10.1177/1479973120904953 (PMC7019390; doi:10.1177/1479973120904953), 2020-02-13
Supplement: supplemenary.pdf [file supplemenary.pdf]

## Appendix

**Table A1. Medline Search Strategy.**

|    |                                                                                                                                                                                                                                                                                                                    |          |
|----|--------------------------------------------------------------------------------------------------------------------------------------------------------------------------------------------------------------------------------------------------------------------------------------------------------------------|----------|
| 1  | exp Pulmonary Disease, Chronic Obstructive/                                                                                                                                                                                                                                                                        | (51369)  |
| 2  | (obstruct\$ adj3 (pulmonary or lung\$ or airway\$ or airflow\$ or bronch\$ or respirat\$)).mp. [mp=title, abstract, original title, name of substance word, subject heading word, keyword heading word, protocol supplementary concept word, rare disease supplementary concept word, unique identifier, synonyms] | (110202) |
| 3  | emphysema.mp. [mp=title, abstract, original title, name of substance word, subject heading word, keyword heading word, protocol supplementary concept word, rare disease supplementary concept word, unique identifier, synonyms]                                                                                  | (33167)  |
| 4  | (copd or coad or cobd).mp. [mp=title, abstract, original title, name of substance word, subject heading word, keyword heading word, protocol supplementary concept word, rare disease supplementary concept word, unique identifier, synonyms]                                                                     | (42175)  |
| 5  | (chronic adj3 bronchitis).mp. [mp=title, abstract, original title, name of substance word, subject heading word, keyword heading word, protocol supplementary concept word, rare disease supplementary concept word, unique identifier, synonyms]                                                                  | (11093)  |
| 6  | 1 or 2 or 3 or 4 or 5                                                                                                                                                                                                                                                                                              | (147446) |
| 7  | exp Dietary Supplements/                                                                                                                                                                                                                                                                                           | (68218)  |
| 8  | exp Nutritional Support/                                                                                                                                                                                                                                                                                           | (43349)  |
| 9  | ((diet\$ or food or nutrition\$ or herbal) adj3 (supplement\$ or support\$ or enhance\$)).mp. [mp=title, abstract, original title, name of substance word, subject heading word, keyword heading word, protocol supplementary concept word, rare disease supplementary concept word, unique identifier, synonyms]  | (110391) |
| 10 | 7 or 8 or 9                                                                                                                                                                                                                                                                                                        | (158546) |
| 11 | exp Rehabilitation/                                                                                                                                                                                                                                                                                                | (285709) |
| 12 | rehab\$.mp. [mp=title, abstract, original title, name of substance word, subject heading word, keyword heading word, protocol supplementary concept word, rare disease supplementary concept word, unique identifier, synonyms]                                                                                    | (304313) |
| 13 | 11 or 12                                                                                                                                                                                                                                                                                                           | (497231) |
| 14 | 6 and 10 and 13                                                                                                                                                                                                                                                                                                    | (140)    |

**Table A2. Embase Search Strategy.**

|                                                                                                                                                                                                                                                                                         |          |
|-----------------------------------------------------------------------------------------------------------------------------------------------------------------------------------------------------------------------------------------------------------------------------------------|----------|
| 1 exp chronic obstructive lung disease/                                                                                                                                                                                                                                                 | (51369)  |
| 2 exp emphysema/                                                                                                                                                                                                                                                                        | (14325)  |
| 3 exp chronic bronchitis/                                                                                                                                                                                                                                                               | (1712)   |
| 4 (obstruct\$ adj3 (pulmonary or lung\$ or airway\$ or airflow\$ or bronch\$ or respirat\$)).mp. [mp=title, abstract, heading word, drug trade name, original title, device manufacturer, drug manufacturer, device trade name, keyword, floating subheading word, candidate term word] | (110202) |
| 5 emphysema.mp. [mp=title, abstract, heading word, drug trade name, original title, device manufacturer, drug manufacturer, device trade name, keyword, floating subheading word, candidate term word]                                                                                  | (33167)  |
| 6 (copd or coad or cobd).mp. [mp=title, abstract, heading word, drug trade name, original title, device manufacturer, drug manufacturer, device trade name, keyword, floating subheading word, candidate term word]                                                                     | (42175)  |
| 7 (chronic adj3 bronchitis).mp. [mp=title, abstract, heading word, drug trade name, original title, device manufacturer, drug manufacturer, device trade name, keyword, floating subheading word, candidate term word]                                                                  | (11093)  |
| 8- 1 or 2 or 3 or 4 or 5 or 6 or 7                                                                                                                                                                                                                                                      | (149229) |
| 9 exp diet supplementation/                                                                                                                                                                                                                                                             | (0)      |
| 10 exp nutritional support/                                                                                                                                                                                                                                                             | (43349)  |
| 11 ((diet\$ or food or nutrition\$ or herbal) adj3 (supplement\$ or support\$ or enhance\$)).mp. [mp=title, abstract, heading word, drug trade name, original title, device manufacturer, drug manufacturer, device trade name, keyword, floating subheading word, candidate term word] | (110391) |
| 12 9 or 10 or 11                                                                                                                                                                                                                                                                        | (142817) |
| 13 exp rehabilitation/                                                                                                                                                                                                                                                                  | (285709) |
| 14 rehab\$.mp. [mp=title, abstract, heading word, drug trade name, original title, device manufacturer, drug manufacturer, device trade name, keyword, floating subheading word, candidate term word]                                                                                   | (304313) |
| 15- 13 or 14                                                                                                                                                                                                                                                                            | (497231) |
| 16- 8 and 12 and 15                                                                                                                                                                                                                                                                     | (140)    |

**Table A3. Allied and Complementary Medicine Database Search Strategy.**

|    |                                                                                                                                                                                                                                                                                                                    |          |
|----|--------------------------------------------------------------------------------------------------------------------------------------------------------------------------------------------------------------------------------------------------------------------------------------------------------------------|----------|
| 1  | exp Pulmonary Disease, Chronic Obstructive/                                                                                                                                                                                                                                                                        | (48121)  |
| 2  | (obstruct\$ adj3 (pulmonary or lung\$ or airway\$ or airflow\$ or bronch\$ or respirat\$)).mp. [mp=title, abstract, original title, name of substance word, subject heading word, keyword heading word, protocol supplementary concept word, rare disease supplementary concept word, unique identifier, synonyms] | (104520) |
| 3  | emphysema.mp. [mp=title, abstract, original title, name of substance word, subject heading word, keyword heading word, protocol supplementary concept word, rare disease supplementary concept word, unique identifier, synonyms]                                                                                  | (32308)  |
| 4  | (copd or coad or cobd).mp. [mp=title, abstract, original title, name of substance word, subject heading word, keyword heading word, protocol supplementary concept word, rare disease supplementary concept word, unique identifier, synonyms]                                                                     | (38816)  |
| 5  | (chronic adj3 bronchitis).mp. [mp=title, abstract, original title, name of substance word, subject heading word, keyword heading word, protocol supplementary concept word, rare disease supplementary concept word, unique identifier, synonyms]                                                                  | (10902)  |
| 6  | 1 or 2 or 3 or 4 or 5                                                                                                                                                                                                                                                                                              | (141003) |
| 7  | exp Dietary Supplements/                                                                                                                                                                                                                                                                                           | (61794)  |
| 8  | exp Nutritional Support/                                                                                                                                                                                                                                                                                           | (42221)  |
| 9  | ((diet\$ or food or nutrition\$ or herbal) adj3 (supplement\$ or support\$ or enhance\$)).mp. [mp=title, abstract, original title, name of substance word, subject heading word, keyword heading word, protocol supplementary concept word, rare disease supplementary concept word, unique identifier, synonyms]  | (102371) |
| 10 | 7 or 8 or 9                                                                                                                                                                                                                                                                                                        | (148194) |
| 11 | exp Rehabilitation/                                                                                                                                                                                                                                                                                                | (272399) |
| 12 | rehab\$.mp. [mp=title, abstract, original title, name of substance word, subject heading word, keyword heading word, protocol supplementary concept word, rare disease supplementary concept word, unique identifier, synonyms]                                                                                    | (170043) |
| 13 | 11 or 12                                                                                                                                                                                                                                                                                                           | (380519) |
| 14 | 6 and 10 and 13                                                                                                                                                                                                                                                                                                    | (125)    |
| 15 | pulmonary disease chronic obstructive/ or bronchitis/ or pulmonary emphysema/ or lung diseases obstructive/                                                                                                                                                                                                        | (80818)  |
| 16 | (obstruct\$ adj3 (pulmonary or lung\$ or airway\$ or airflow\$ or bronch\$ or respirat\$)).mp. [mp=title, abstract, original title, name of substance word, subject heading word, keyword heading word, protocol supplementary concept word, rare disease supplementary concept word, unique identifier, synonyms] | (104520) |
| 17 | emphysema.mp. [mp=title, abstract, original title, name of substance word, subject heading word, keyword heading word, protocol supplementary concept word, rare disease supplementary concept word, unique identifier, synonyms]                                                                                  | (32308)  |
| 18 | (copd or coad or cobd).mp. [mp=title, abstract, original title, name of substance word, subject heading word, keyword heading word, protocol supplementary concept word, rare disease supplementary concept word, unique identifier, synonyms]                                                                     | (38816)  |
| 19 | (chronic adj3 bronchitis).mp. [mp=title, abstract, original title, name of substance word, subject heading word, keyword heading word, protocol supplementary concept word, rare disease supplementary concept word, unique identifier, synonyms]                                                                  | (10902)  |
| 20 | 15 or 16 or 17 or 18 or 19                                                                                                                                                                                                                                                                                         | (151650) |
| 21 | dietary supplements/                                                                                                                                                                                                                                                                                               | (46793)  |

|    |                                                                                                                                                                                                                                                                                                                  |          |
|----|------------------------------------------------------------------------------------------------------------------------------------------------------------------------------------------------------------------------------------------------------------------------------------------------------------------|----------|
| 22 | ((diet\$ or food or nutrition\$ or herbal) adj3 (supplement\$ or support\$ or enhance\$)).mp. mp=title, abstract, original title, name of substance word, subject heading word, keyword heading word, protocol supplementary concept word, rare disease supplementary concept word, unique identifier, synonyms] | (102371) |
| 23 | 21 or 22                                                                                                                                                                                                                                                                                                         | (102371) |
| 24 | exp rehabilitation/                                                                                                                                                                                                                                                                                              | (272399) |
| 25 | rehab\$.mp. [mp=title, abstract, original title, name of substance word, subject heading word, keyword heading word, protocol supplementary concept word, rare disease supplementary concept word, unique identifier, synonyms]                                                                                  | (170043) |
| 26 | 24 or 25                                                                                                                                                                                                                                                                                                         | (380519) |
| 27 | 20 and 23 and 26                                                                                                                                                                                                                                                                                                 | (120)    |

**Table A4. CINHAL**

|     |                                                                                  |
|-----|----------------------------------------------------------------------------------|
| S1  | (MH "Pulmonary Disease, Chronic Obstructive+")                                   |
| S2  | (MH "Emphysema+")                                                                |
| S3  | obstruc* N3 (pulmonary OR lung* OR airway* OR airflow* OR bronch* OR respirat*)  |
| S4  | emphysema                                                                        |
| S5  | COPD OR COAD OR COBD                                                             |
| S6  | chronic N3 bronchitis                                                            |
| S7  | S1 OR S2 OR S3 OR S4 OR S5 OR S6                                                 |
| S8  | (MH "Nutritional Support+")                                                      |
| S9  | (diet* OR food OR nutrition* OR herbal) N3 (supplement* OR support* OR enhance*) |
| S10 | S8 OR S9                                                                         |
| S11 | (MH "Rehabilitation+")                                                           |
| S12 | rehab*                                                                           |
| S13 | S11 OR S12                                                                       |
| S14 | S7 AND S10 AND S13                                                               |

**Table A5. Web of Science**

|      |                                                                                                                                                                                                                                                                                                    |          |
|------|----------------------------------------------------------------------------------------------------------------------------------------------------------------------------------------------------------------------------------------------------------------------------------------------------|----------|
| # 1  | TOPIC: (obstruct* NEAR/3 (pulmonary or lung* or airway* or airflow* or bronch* or respirat*))                                                                                                                                                                                                      | (93750)  |
| # 2  | TOPIC: (obstruct* NEAR/3 (pulmonary or lung* or airway* or airflow* or bronch* or respirat*))<br>OR TOPIC: (emphysema) OR TOPIC: (chronic NEAR/3 bronchitis) OR TOPIC: (COPD OR COAD OR COBD)                                                                                                      | (135223) |
| # 3  | TOPIC: (obstruct* NEAR/3 (pulmonary or lung* or airway* or airflow* or bronch* or respirat*)) OR TOPIC:<br>(emphysema) OR TOPIC: (chronic NEAR/3 bronchitis) OR TOPIC: (COPD OR COAD OR COBD) AND TOPIC:<br>((diet* or food or nutrition* or herbal) NEAR/3 (supplement* or support* or enhance*)) | (114803) |
| # 4  | TOPIC: (obstruct* NEAR/3 (pulmonary or lung* or airway* or airflow* or bronch* or respirat*))<br>OR TOPIC: (emphysema OR (chronic NEAR/3 bronchitis) OR (COPD OR COAD OR COBD))                                                                                                                    | (135223) |
| # 5  | TOPIC: ((obstruct* NEAR/3 (pulmonary or lung* or airway* or airflow* or bronch* or respirat*))<br>OR emphysema OR (chronic NEAR/3 bronchitis) OR (COPD OR COAD OR COBD))                                                                                                                           | (135223) |
| # 6  | TOPIC: ((obstruct* NEAR/3 (pulmonary or lung* or airway* or airflow* or bronch* or respirat*))<br>OR emphysema OR (chronic NEAR/3 bronchitis) OR (COPD OR COAD OR COBD)) AND TOPIC:<br>((diet* or food or nutrition* or herbal) NEAR/3 (supplement* or support* or enhance*))                      | (491)    |
| # 7  | TOPIC: ((obstruct* NEAR/3 (pulmonary or lung* or airway* or airflow* or bronch* or respirat*))<br>OR emphysema OR (chronic NEAR/3 bronchitis) OR (COPD OR COAD OR COBD)) AND TOPIC:<br>((diet* or food or nutrition* or herbal) NEAR/3 (supplement* or support* or enhance*)) AND TOPIC:(rehab*)   | (102)    |
| # 8  | TOPIC: ((obstruct* NEAR/3 (pulmonary or lung* or airway* or airflow* or bronch* or respirat*))<br>OR emphysema OR (chronic NEAR/3 bronchitis) OR (COPD OR COAD OR COBD)) AND TOPIC:<br>((diet* or food or nutrition* or herbal) NEAR/3 (supplement* or support* or enhance*)) AND TOPIC:(rehab*)   | (102)    |
| # 9  | TS=(obstruct* NEAR/3 (pulmonary or lung* or airway* or airflow* or bronch* or respirat*))                                                                                                                                                                                                          | (93750)  |
| # 10 | TS=(emphysema)                                                                                                                                                                                                                                                                                     | (22729)  |
| # 11 | TS=(COPD OR COAD OR COBD)                                                                                                                                                                                                                                                                          | (57609)  |
| # 12 | TS=(chronic NEAR/3 bronchitis)                                                                                                                                                                                                                                                                     | (9926)   |
| # 13 | #12 OR #11 OR #10 OR #9                                                                                                                                                                                                                                                                            | (135223) |
| # 14 | TS=((diet* or food or nutrition* or herbal) NEAR/3                                                                                                                                                                                                                                                 | (103028) |
| # 15 | TS=(rehab*)                                                                                                                                                                                                                                                                                        | (205904) |
| # 16 | #15 AND #14 AND #13                                                                                                                                                                                                                                                                                | (102)    |

**Table A6. Excluded Studies**

| First Author       | Study Title                                                                                                                                                                                              | Reason                                                        |
|--------------------|----------------------------------------------------------------------------------------------------------------------------------------------------------------------------------------------------------|---------------------------------------------------------------|
| Schols, 1998       | Weight Loss is a Reversible Factor in the Prognosis of COPD                                                                                                                                              | The study was designed to answer different research questions |
| Curtis, K, 2015    | Acute Dietary Nitrate Supplementation and Exercise Performance in COPD: A Double-Blind, Placebo-Controlled, Randomised Controlled Pilot Study.                                                           | Participants were not in Pulmonary rehabilitation             |
| Pison, C, 2011     | Multimodal Nutritional rehabilitation improves clinical outcomes of malnourished patients with chronic respiratory failure: a randomized controlled trial.                                               | Population were not only COPD                                 |
| Slinde, F, 2001    | Individual dietary Intervention in patients With COPD during Multidisciplinary rehabilitation.                                                                                                           | No nutritional supplement                                     |
| Marinari, S, 2013  | Effects of nutraceutical diet integration, with coenzyme Q10 (Q-Ter multicomposite) and creatine, on dyspnea, exercise tolerance, and quality of life in COPD patients with chronic respiratory failure. | Participants were not in Pulmonary rehabilitation             |
| Candemir, I, 2017  | Oral nutritional support in patients with COPD who completed the pulmonary rehabilitation program; Six months and one-year follow-ups                                                                    | Table are not in English                                      |
| Olveira, G, 2015   | Oral supplement enriched in HMB combined with pulmonary rehabilitation improves body composition and health related quality of life in patients with bronchiectasis (Prospective, Randomised Study)      | Participants were not COPD                                    |
| Beer M, 2019       | Clinical outcome and cost-effectiveness of a 1-year nutritional intervention programme in COPD patients with low muscle mass: The randomized controlled NUTRAIN trial                                    | Duplicated to an original study included already.             |
| Constantin D, 2013 | Skeletal muscle molecular responses to resistance training and dietary supplementation in COPD                                                                                                           | Participants were not in Pulmonary rehabilitation.            |
| Ogasawara T, 2018  | Effect of eicosapentaenoic acid on prevention of lean body mass depletion in patients with exacerbation of chronic obstructive pulmonary disease: A prospective randomized controlled trial              | Participants were at hospital.                                |

**Table A7.** Risk of bias of the included cohort study

| First Author      | Random Sequence generation | Allocation concealment | Selective reporting | Blinding subject+ personnel | Blinding outcome assessment | incomplete outcome data) | Other source of bias | OVERALL (0-7, higher score = higher risk of bias) |
|-------------------|----------------------------|------------------------|---------------------|-----------------------------|-----------------------------|--------------------------|----------------------|---------------------------------------------------|
| Bool, 2017        | Low                        | Low                    | Low                 | Low                         | Low                         | Low                      | Unclear              | 1                                                 |
| Sugawara, 2012    | Low                        | Low                    | Low                 | Low                         | Low                         | Low                      | Unclear              | 1                                                 |
| Paulin, 2016      | Low                        | Unclear                | Low                 | Low                         | Low                         | Low                      | Low                  | 1                                                 |
| Faager, 2006      | Low                        | Unclear                | Low                 | Low                         | Low                         | Low                      | Low                  | 1                                                 |
| Laviolette, 2010  | Low                        | Unclear                | Low                 | Low                         | Low                         | Low                      | Unclear              | 2                                                 |
| Borgh-Silva, 2006 | Low                        | Low                    | Low                 | Low                         | High                        | Low                      | Low                  | 1                                                 |
| Gurgun, 2013      | Low                        | Low                    | Low                 | High                        | Unclear                     | Low                      | Low                  | 2                                                 |
| Beers, 2019       | Low                        | Unclear                | Low                 | Low                         | Low                         | Low                      | Unclear              | 2                                                 |
| Deacon, 2008      | Low                        | High                   | Low                 | Low                         | Low                         | Low                      | Unclear              | 2                                                 |
| Vermeeren, 2000   | High                       | Unclear                | Low                 | Low                         | Low                         | Low                      | Unclear              | 3                                                 |
| Baldi, 2010.      | Low                        | Unclear                | Low                 | High                        | High                        | Low                      | Low                  | 3                                                 |
| Fuld, 2005        | Low                        | Unclear                | Low                 | Low                         | Low                         | High                     | High( design)        | 3                                                 |
| Wetering, 2009    | Low                        | Low                    | Low                 | High                        | Low                         | High                     | Unclear              | 3                                                 |
| Broekhuizen, 2005 | Low                        | High                   | High                | Low                         | Low                         | Low                      | Unclear              | 3                                                 |
| Steiner, 2003     | Low                        | High                   | Low                 | Low                         | Low                         | High(drop rate)          | Unclear              | 3                                                 |
| Schols, 1995      | Low                        | Unclear                | Low                 | High                        | High                        | Low                      | unclear              | 4                                                 |
| Hornikx, 2012     | High                       | High                   | Low                 | Low                         | Low                         | Low                      | High                 | 3                                                 |
| Ogasawara, 2018   | Low                        | Low                    | High                | High                        | High                        | Low                      | Unclear              | 4                                                 |
| Ahnfeldt, 2015    | Low                        | Low                    | Low                 | High                        | High                        | High                     | Unclear              | 4                                                 |

**Table A8.** Risk of bias of the included cohort study

| First author      | Population representative | Sample size adequate | Confounders | Statistical analysis | Missing data | Methodology of the outcome | Objective assessment | OVERALL (0-3, higher score = lower risk of bias) |
|-------------------|---------------------------|----------------------|-------------|----------------------|--------------|----------------------------|----------------------|--------------------------------------------------|
| Creutzberg, 2000  | 3                         | 0                    | 2           | 3                    | 3            | 3                          | 3                    | 2.4                                              |
| Broekhuizen, 2005 | 3                         | 2                    | 0           | 3                    | 3            | 3                          | 2                    | 2.3                                              |
| Creutzberg, 2003  | 3                         | 2                    | 0           | 3                    | 3            | 3                          | 3                    | 2.4                                              |
| Menier, 2001      | 3                         | 2                    | 0           | 0                    | 3            | 1                          | 3                    | 1.7                                              |
| Kubo, 2006        | 3                         | 0                    | 0           | 0                    | 3            | 0                          | 2                    | 1.1                                              |

0 = definitely no (high risk of bias); 1 = mostly no; 2 = Mostly yes; 3 = definitely yes (low risk of bias)
